# Supplementary material
Source: Royal Society of Chemistry journal article supplement (doi:10.1039/d6nr00054a)
Supplement: d6nr00054a1.pdf [file d6nr00054a1.pdf]

1

Supporting Information

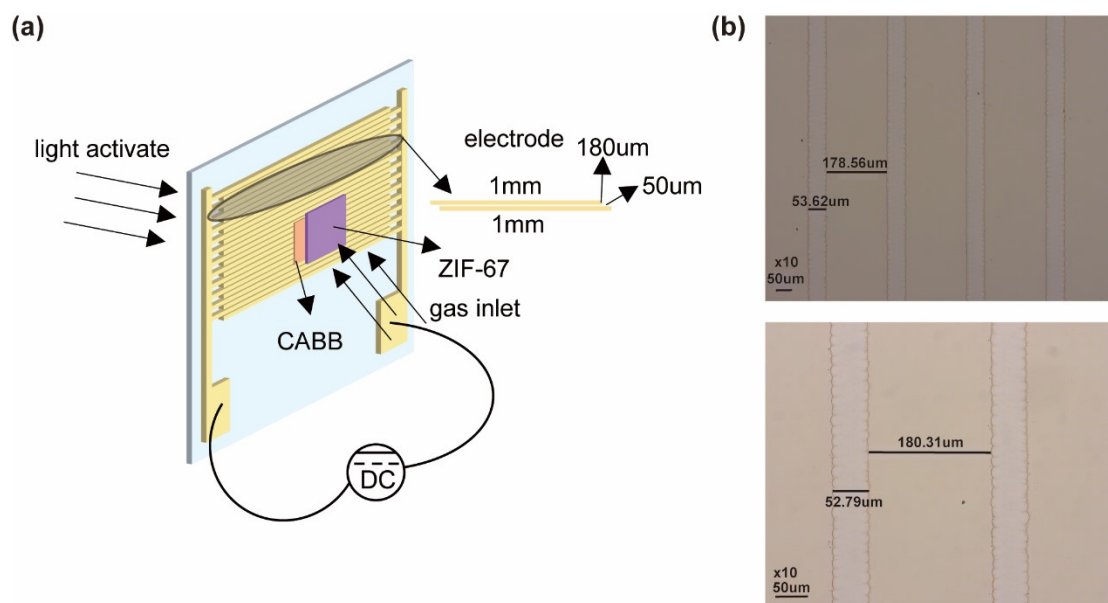

2

3 **Figure S1.** (a) Electrode Structure. (b) Microscope image of the electrode.

4

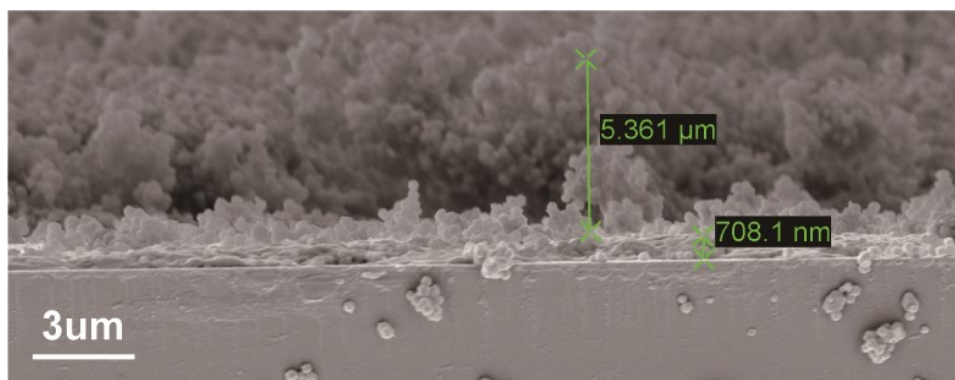

5

6 **Figure S2.** Cross-sectional SEM picture of the device.

7

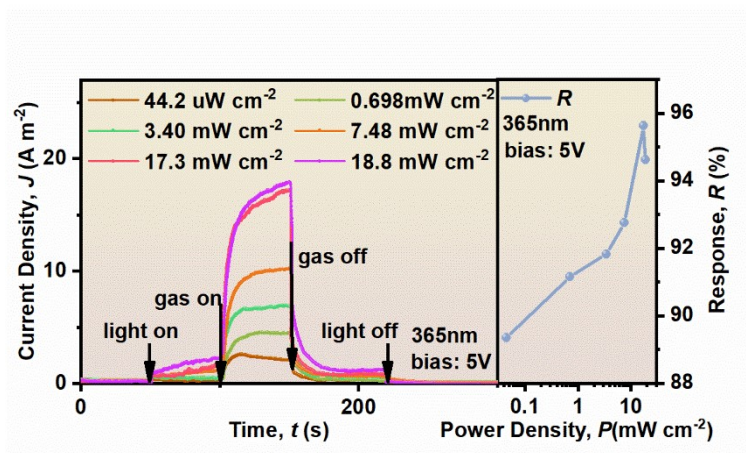

8

1 **Figure S3.** Gas response of ZIF-67/CABB heterojunction under different light power density. The  
 2 voltage bias is 5V and the wavelength is 365nm. The CO<sub>2</sub> concentration is 14000ppm.

3

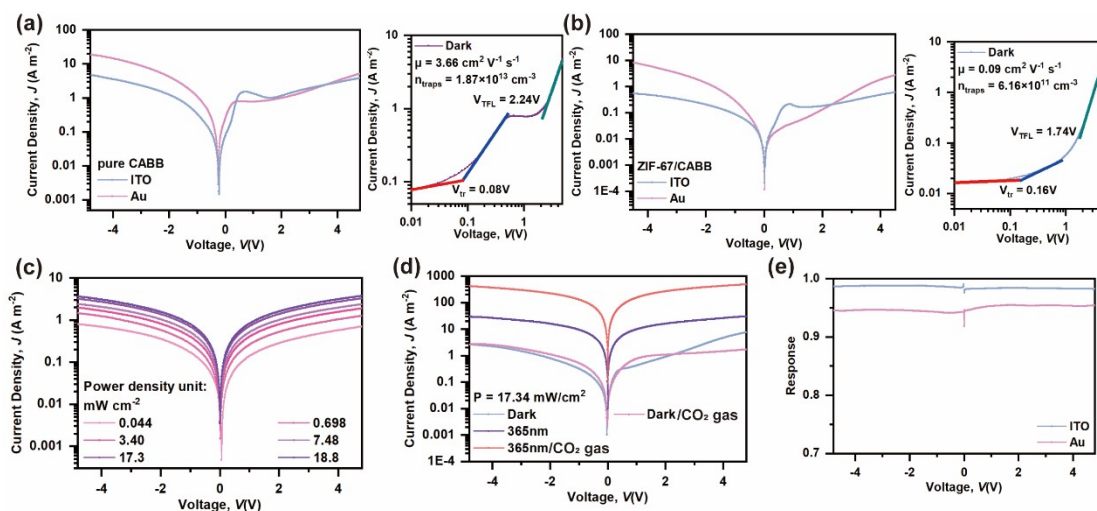

4

5 **Figure S4.** (a<sub>1</sub>), (b<sub>1</sub>) J-V symmetry analysis of the (a<sub>1</sub>) CABB device and (b<sub>1</sub>) ZIF-67/CABB device,  
 6 with ITO and Au electrode. SCLC characterization of (a<sub>2</sub>) pure CABB and (b<sub>2</sub>) heterojunction with  
 7 Au electrode. (c) J-V curves of the heterojunction made by ITO electrode with different incident  
 8 power density. (d) The gas current density (light, dark) and air current density (light, dark) of ZIF-  
 9 67/CABB tested by Au electrode. (e) Response of the heterojunction calculated by J-V curves with  
 10 ITO and Au electrode.

11

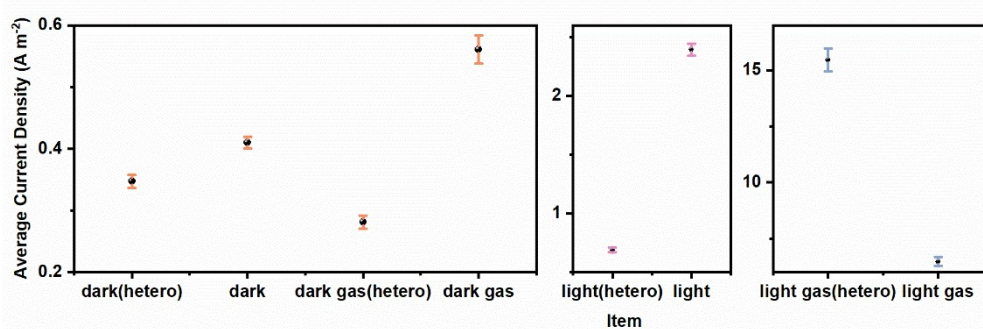

12

13 **Figure S5** Device-to-device statistical error bars of the current density tested by 5 ZIF-67/CABB  
 14 heterojunction samples. Where the voltage bias is 5V. Light wavelength is 365nm, light power  
 15 density is 17.34 mW cm<sup>-2</sup>, gas concentration is 14000ppm.

16

17

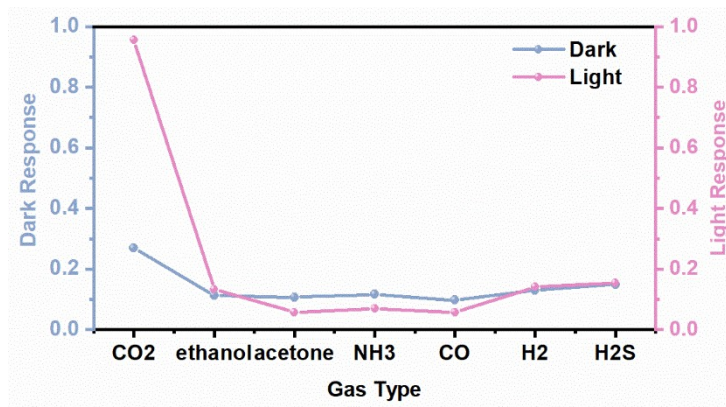

1

2 **Figure S6.** The selectivity of ZIF-67/CABB heterojunction samples under dark or light condition.  
 3 The light condition is wavelength of 365nm and incident power density of 17.34 mW cm<sup>-2</sup>. Where  
 4 CO<sub>2</sub> is 14000ppm, ethanol is 200ppm, H<sub>2</sub>S is 100ppm, and other gases are 1000ppm.

5

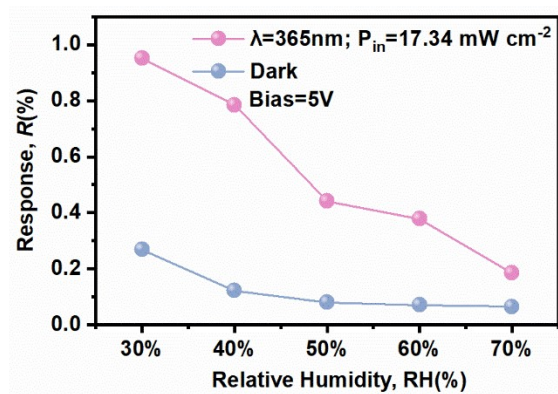

6

7 **Figure S7.** The humidity dependence of ZIF-67/CABB heterojunction samples under dark or light  
 8 condition. The light condition is wavelength of 365nm and incident power density of 17.34 mW  
 9 cm<sup>-2</sup>.

10

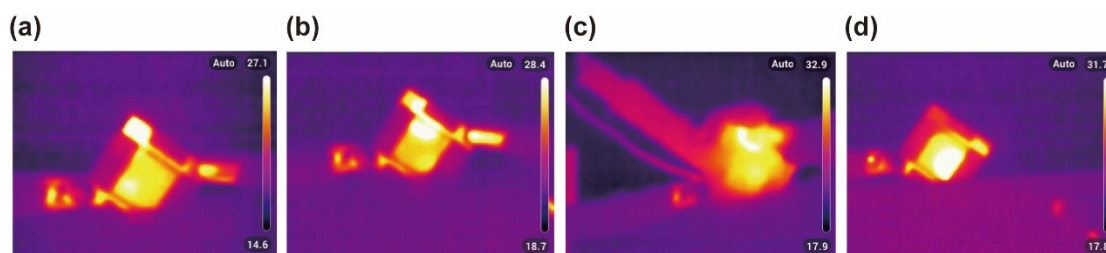

11

12 **Figure S8.** Device temperature at (a) un-work state, (b) 5V bias at dark condition for 30min, (c) 5V  
 13 bias with UV light for 30min, (d) un-work state after working under 5V bias with UV light for  
 14 30min.

15

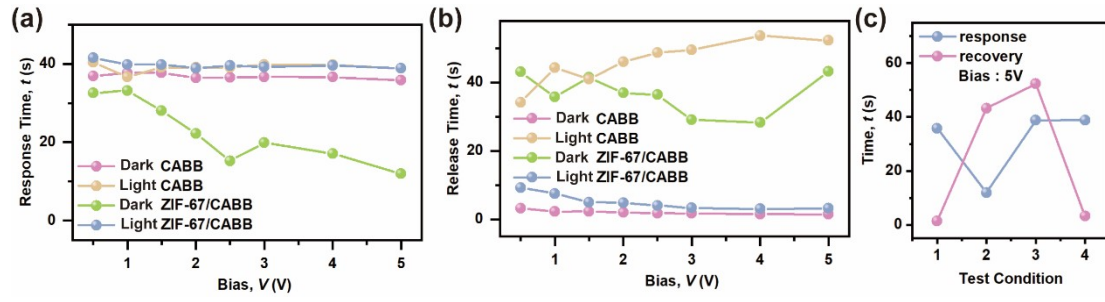

1

2 **Figure S9.** Time fitting is obtained by time change between 10% to 90% current density or 90% to  
 3 10% current density. (a) Device response time. (b) Device recovery time. (c) Response/Recovery  
 4 time at 5V bias and Dark/Light CABB and ZIF-67/CABB heterojunction.

5
